# Supplementary material
Source: MDPI journal article supplement (https://www.mdpi.com/2571-6980/4/3/12)
Supplement: s1 [file s1]

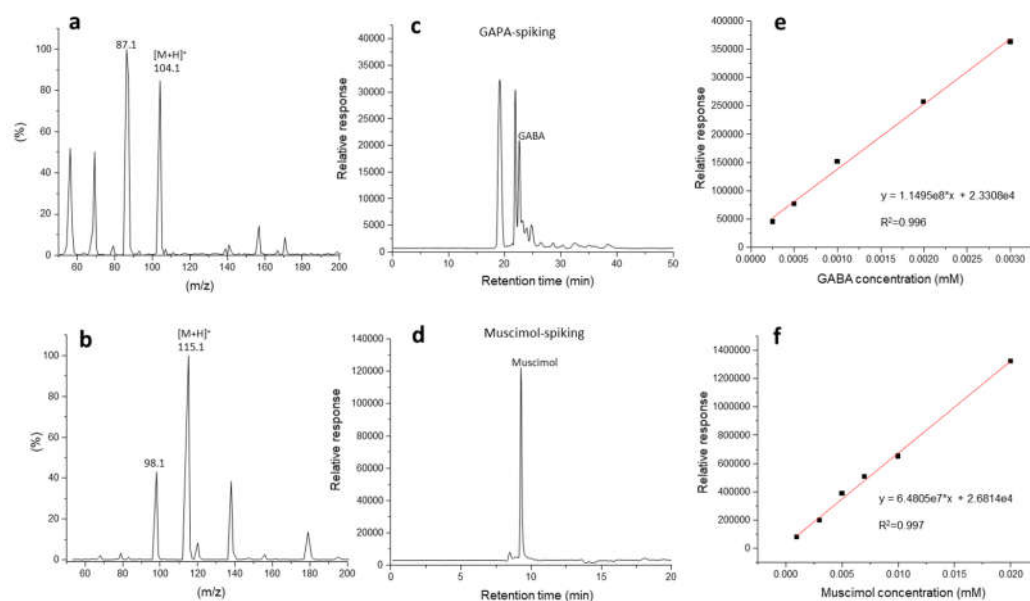

**Supplementary Figure S1.** ESI-MS positive ion scanning spectra for GABA (a) and muscimol (b); Single ion monitoring mode chromatograms of AME-1 spiked with GABA (c) and muscimol (d); calibration curve of GABA (e) and muscimol (f) ( $n=3$ ).

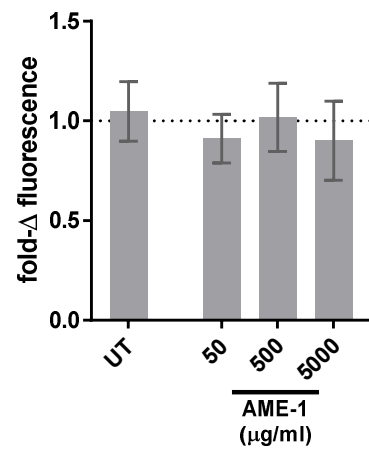

**Supplementary Figure S2.** Effect of AME-1 on ROS generation. HMC3 cells were treated with AME-1 and indicated concentrations for 24 hr and ROS generation was measured as indicated in Materials and Methods. Data were analyzed by one-way ANOVA with tukey post-hoc analysis and are presented as mean  $\pm$  SEM of n=3.

**Supplementary Table S1.** List of metabolite composition of AME-1 as analyzed by NMR

|    | Compound Name               | Concentration (mM) |    | Compound Name       | Concentration (mM) |
|----|-----------------------------|--------------------|----|---------------------|--------------------|
| 1  | 2-Aminoadipate              | 0.1086             | 43 | Gluconate           | 0.5847             |
| 2  | 2-Hydroxy-3-methylvalerate  | 0.0429             | 44 | Glucose             | 0.3952             |
| 3  | 2-Hydroxybutyrate           | 0.0989             | 45 | Glucose-6-phosphate | 0.1081             |
| 4  | 2-Hydroxyglutarate          | 0.1484             | 46 | Glutamine           | 0.087              |
| 5  | 2-Hydroxyvalerate           | 0.0346             | 47 | Glycerol            | 0.3792             |
| 6  | 2-Methylglutarate           | 0.0096             | 48 | Glycine             | 0.0797             |
| 7  | 2-Octenoate                 | 0.0815             | 49 | Guanidoacetate      | 0.4524             |
| 8  | 2-Oxocaproate               | 0.0387             | 50 | Guanosine           | 0.0296             |
| 9  | 2-Oxoglutarate              | 0.0437             | 51 | Histidine           | 0.0133             |
| 10 | 2-Phenylpropionate          | 0.0226             | 52 | Homoserine          | 0.2914             |
| 11 | 2-Phosphoglycerate          | 0.278              | 53 | Inosine             | 0.013              |
| 12 | 3,5-Dibromotyrosine         | 0.0077             | 54 | Isocitrate          | 0.1194             |
| 13 | 3-Aminoisobutyrate          | 0.05               | 55 | Isoleucine          | 0.0472             |
| 14 | 3-Hydroxy-3-methylglutarate | 0.0225             | 56 | Lactate             | 0.6652             |
| 15 | 3-Methylglutarate           | 0.0564             | 57 | Lactose             | 0.0587             |
| 16 | 4-Aminobutyrate             | 0.0030             | 58 | Leucine             | 0.0886             |
| 17 | Acetate                     | 0.07               | 59 | Lysine              | 0.0366             |
| 18 | Adenosine                   | 0.0279             | 60 | Malate              | 0.6452             |
| 19 | Alanine                     | 0.3031             | 61 | Malonate            | 0.0404             |
| 20 | Arabinitol                  | 0.124              | 62 | Mannitol            | 0.146              |
| 21 | Arginine                    | 0.138              | 63 | Methionine          | 0.015              |
| 22 | Aspartate                   | 0.1507             | 64 | Muscimol            | 0.044              |
| 23 | Azelate                     | 0.0289             | 65 | myo-Inositol        | 0.0977             |
| 24 | Betaine                     | 0.0249             | 66 | N-Acetylcysteine    | 0.0367             |
| 25 | Biotin                      | 0.0959             | 67 | Nicotinate          | 0.0163             |
| 26 | Butyrate                    | 0.0186             | 68 | O-Phosphocholine    | 0.0966             |
| 27 | Carnitine                   | 0.0531             | 69 | Ornithine           | 0.0722             |
| 28 | Choline                     | 0.1141             | 70 | Phenylacetate       | 0.0155             |
| 29 | cis,cis-Muconate            | 0.0194             | 71 | Phenylalanine       | 0.0651             |
| 30 | Citraconate                 | 0.0158             | 72 | Proline             | 0.1891             |
| 31 | Citrate                     | 0.0878             | 73 | Propylene glycol    | 0.0106             |
| 32 | Cytosine                    | 0.0128             | 74 | Pyroglutamate       | 0.6105             |
| 33 | dTTP                        | 0.0243             | 75 | Serine              | 0.2087             |
| 34 | Ethylene glycol             | 0.1265             | 76 | Succinate           | 0.2554             |
| 35 | Formate                     | 0.0207             | 77 | Tartrate            | 0.0253             |
| 36 | Fucose                      | 0.0492             | 78 | Taurine             | 0.0917             |
| 37 | Fumarate                    | 0.3199             | 79 | Threonine           | 0.1179             |
| 38 | Galactarate                 | 0.038              | 80 | Trehalose           | 1.3831             |
| 39 | Galactonate                 | 0.0486             | 81 | Tyrosine            | 0.0224             |
| 40 | Galactose                   | 0.0366             | 82 | Uridine             | 0.0459             |
| 41 | Glucarate                   | 0.1183             | 83 | Valine              | 0.0701             |
| 42 | Glucitol                    | 0.4223             | 84 | β-Alanine           | 0.0201             |
